# Supplementary figures and images for: Hospital-at-home Integrated Care Programme for the management of disabling health crises in older patients: comparison with bed-based Intermediate Care
Source: Oxford University Press journal article supplement (doi:10.1093/ageing/afx099), 2017-06-08

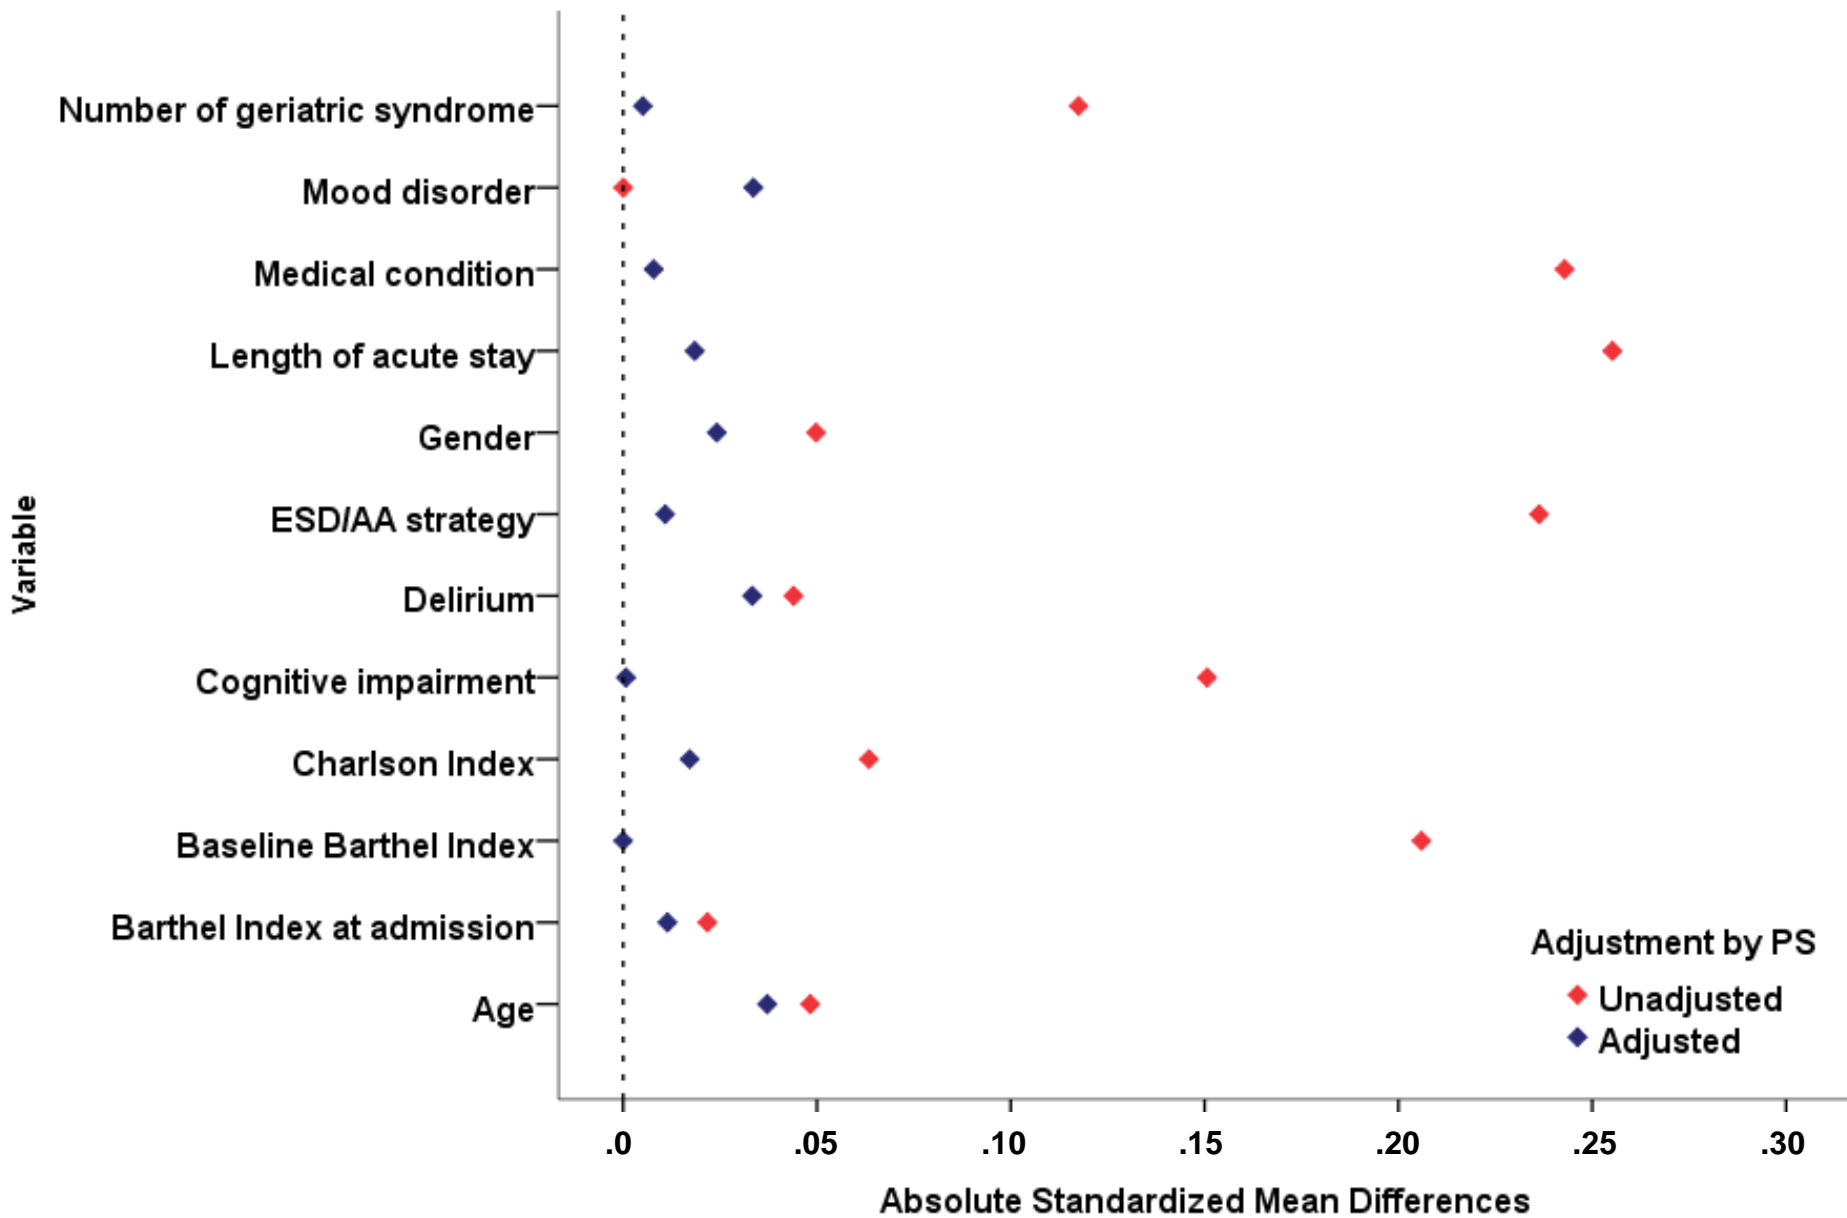

Supplement: afx099_SMDv2.pdf [file afx099_SMDv2.pdf]
